# Supplementary material for: Calprotectin, an Emerging Biomarker of Interest in COVID-19: A Systematic Review and Meta-Analysis
Source: J Clin Med. 2021 Feb 15;10(4):775. doi: 10.3390/jcm10040775 (PMC7919496; doi:10.3390/jcm10040775)
Supplement: Supplementary file 1 [file jcm-10-00775-s001.pdf]

## Appendix:

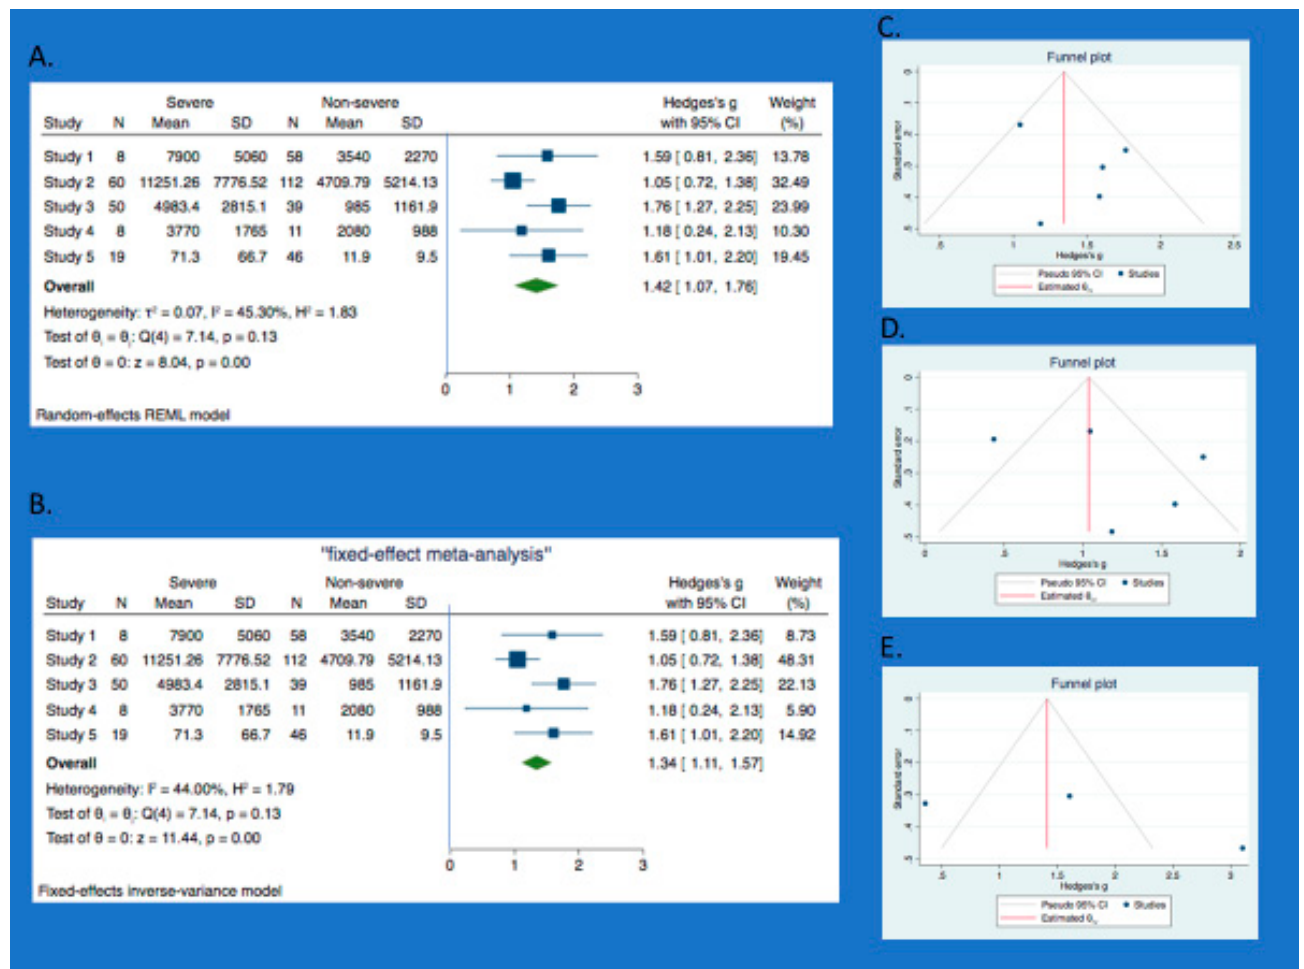

**Figure S1:** Meta-analysis (sensitivity analysis excluding three studies). A. Forest plot (REM) and B. Forest plot (FEM) comparing the mean differences in calprotectin level between severe and non-severe COVID-19. Studies 1-5 are respectively - De Gadiana et al [25]; Shi et al [26]; Silvin et al [12]; Bauer et al [27]; Ojetti et al [28]. C. Funnel plot (for the sensitivity analysis excluding three studies) shows no publication bias, an improvement from the total cohort funnel plot shown in figure 3c. D. Funnel plot (Subgroup analysis - Serum group) shows no publication bias. E. Funnel plot (Subgroup analysis - faecal group) shows some evidence of publication bias with much asymmetry.

**Table S1:** Quality assessment for the included cohort / case-control studies using Newcastle-Ottawa Scale<sup>31-32</sup>

| Study                            | Item 1 | Item 2 | Item 3 | Item 4 | Item 5 | Item 6 | Item 7 | Item 8 | Score |
|----------------------------------|--------|--------|--------|--------|--------|--------|--------|--------|-------|
| Chen et al <sup>14</sup>         | *      | *      | *      | *      | **     | *      | *      | *      | 9/9   |
| Shi et al <sup>26</sup>          | *      | *      | *      | *      | *      | *      | *      | *      | 8/9   |
| Silvin et al <sup>12</sup>       | *      | *      | *      | *      | **     | *      | *      | *      | 9/9   |
| Bauer et al <sup>27</sup>        | *      | *      | *      | *      | *      | *      | *      | *      | 8/9   |
| Effenberg<br>et al <sup>18</sup> | *      | *      | *      | *      | *      | *      | *      | NR     | 7/9   |
| Ojetti et al <sup>28</sup>       | *      | *      | *      | *      | *      | *      | *      | *      | 8/9   |
| Britton et<br>al <sup>29</sup>   | *      | *      | *      | *      | *      | *      | *      | *      | 8/9   |
| Unterman et<br>al <sup>33</sup>  | *      | *      | *      | *      | *      | *      | *      | *      | 8/9   |
| Livanos et<br>al <sup>34</sup>   | *      | *      | -      | -      | -      | *      | *      | NR     | 4/9   |

**NB:** Items were as follows for cohort studies: 1-representativeness of the exposed cohort; 2-selection of the nonexposed cohort; 3-ascertainment of exposure; 4-demonstration that the outcome of interest was not present at the start of the study; \*\*5-a comparability of cohorts on the basis of the design or analysis; 6-assessment of the outcome 7-follow-up period was long enough for outcomes to occur; 8-adequacy of follow-up evaluation (>75% follow-up evaluation, or description for those lost).

Items were as follows for case-control studies: 1-Is the case definition adequate 2-representativeness of the cases; 3-selection of controls; 4-definition of controls; 5-comparability of cases and controls on the basis of the design or analysis; 6-ascertainment of exposure; 7-same method of ascertainment for cases and controls; 8-non-response rate. \*\*Item 5 for any of the study designs is scored double stars while the rest of the items are scored 1 star each.

**Table S2:** Quality assessment for included case series studies using NIH tool<sup>30</sup>

| De Guadiana et al, 2020 <sup>25</sup>                                                                                      |        |
|----------------------------------------------------------------------------------------------------------------------------|--------|
| Criteria                                                                                                                   | Yes/No |
| 1. Was the study question or objective clearly stated?                                                                     | Yes    |
| 2. Was the study population clearly and fully described, including a case definition?                                      | Yes    |
| 3. Were the cases consecutive?                                                                                             | Yes    |
| 4. Were the subjects comparable?                                                                                           | Yes    |
| 5. Was the intervention clearly described?                                                                                 | Yes    |
| 6. Were the outcome measures clearly defined, valid, reliable, and implemented consistently across all study participants? | Yes    |
| 7. Was the length of follow-up adequate?                                                                                   | Yes    |
| 8. Were the statistical methods well-described?                                                                            | Yes    |
| 9. Were the results well-described?                                                                                        | Yes    |
| Quality rating                                                                                                             | Good   |

**NB:** NIH Quality assessment tool for case series studies. CD, cannot determine; NA, not applicable; NR, not reported
